# Supplementary material for: Probing the microscopic hydrophobicity of smectite surfaces. A vibrational spectroscopic study of dibenzo-p-dioxin sorption to smectite
Source: Royal Society of Chemistry journal article supplement (doi:10.1039/b822635k), 2009-01-01
Supplement: b822635k.pdf [file b822635k.pdf]

Probing the microscopic hydrophobicity of smectite surfaces. A vibrational spectroscopic study of dibenzo-p-dioxin sorption to smectite

Kiran Rana<sup>1</sup>, Stephen A. Boyd<sup>2</sup>, Brian J. Teppen<sup>2</sup>, Hui Li<sup>2</sup>, Cun Liu<sup>2</sup> and Cliff. T. Johnston<sup>1\*</sup>

<sup>1</sup>Crop, Soil and Environmental Sciences, Purdue University, 915 W. State Street  
West Lafayette, IN 47907-2054, USA  
765 496 1716 (phone), 765 496 2926 (fax), clays@purdue.edu

<sup>2</sup>Department of Crop and Soil Sciences, Michigan State University, East Lansing,  
MI 48824, USA

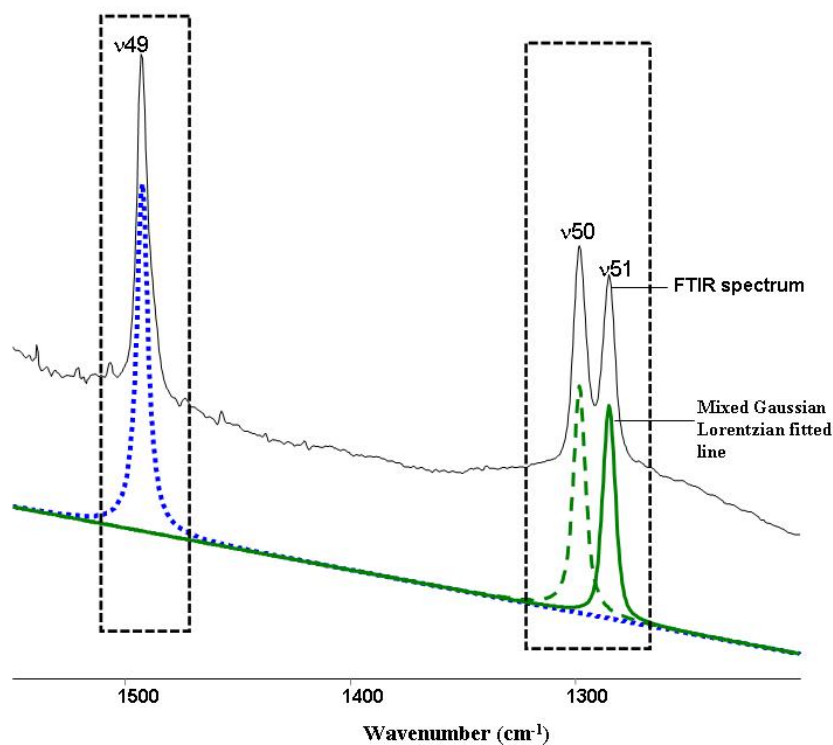

Fig. S1. Peak-fitted spectra of DD –Cs-saponite complex in the region of 1520- 1270 cm<sup>-1</sup>. Peak fitting was done using mixed Gaussian-Lorentzian function. Peak intensity and Peak area of fitted spectra were used for quantitative and qualitative analysis of DD sorbed to smectite clay with different exchangeable cations.

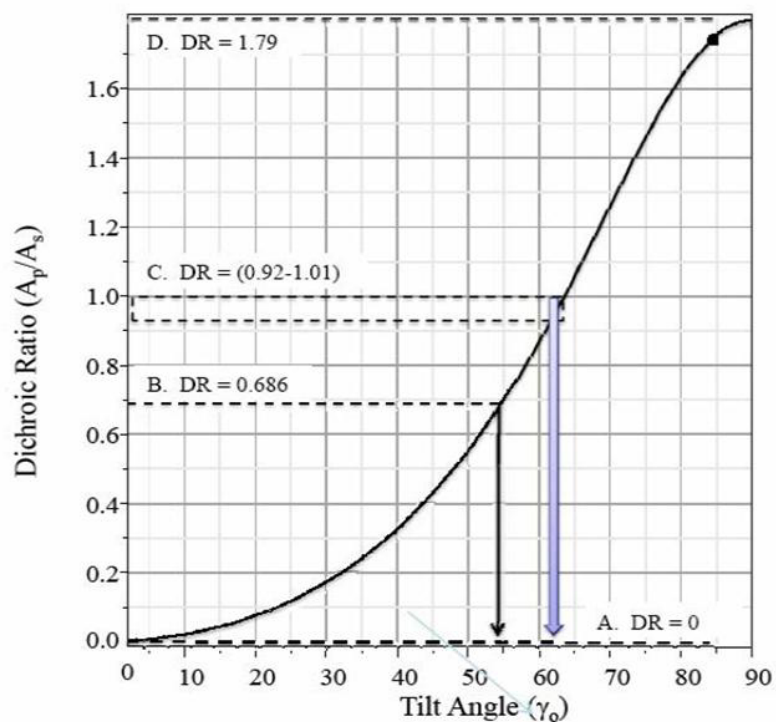

Fig. S2. Relationship between ATR dichroic ratios (D) and tilt angle ( $\gamma$ ) of solute with respect to the surface of IRE. A, B, and D indicate the solute is oriented perpendicular, parallel, and isotropically to the IRE surface, respectively. The relationship between the dichroic ratio and tilt angle of DD sorbed on Cs-saponite are shown in C. Average tilt angle ( $\gamma$ ) of the IR transition dipole moment was calculated using the refractive index of ZnSe (2.406), Clay: Saponite (1.504) and water (1.333) and angle of incidence  $45^\circ$ .

Isomorphous Substitution of Mg → Al in the octahedral layer (montmorillonite)

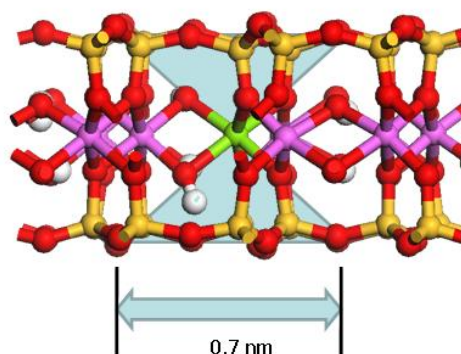

Isomorphous Substitution of Al → Si in the tetrahedral layer (saponite)

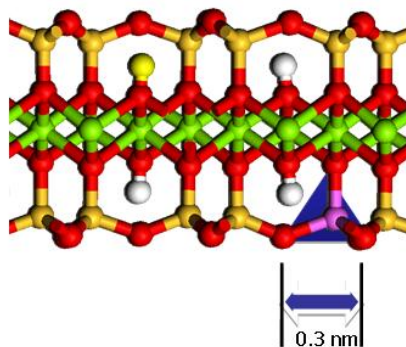

Fig. S3. Ball and stick representation of charge distribution on smectite clay with isomorphous substitution in octahedral sheet (top) and tetrahedral sheet (bottom) representing the approximate charge distribution for montmorillonite and saponite, respectively.  
Table S 1. Observed and calculated Raman and IR vibrational frequencies (cm<sup>-1</sup>) of dibenzo-p-dioxin in crystalline and a polar solvents

Supplementary Material (ESI) for *PCCP*  
This journal is © the Owner Societies 2009

Table S 1. Observed and calculated Raman and IR vibrational frequencies (cm<sup>-1</sup>) of dibenzo-*p*-dioxin in crystalline and a polar solvents

| Experimental                        |                                       | IR frequency (cm <sup>-1</sup> )  |                                       | N                                 | Theoretical <sup>‡</sup><br>predicted by<br>BLYP/631G <sup>++</sup> | Band Assignment                     |
|-------------------------------------|---------------------------------------|-----------------------------------|---------------------------------------|-----------------------------------|---------------------------------------------------------------------|-------------------------------------|
| Raman frequency (cm <sup>-1</sup> ) |                                       | IR frequency (cm <sup>-1</sup> )  |                                       |                                   |                                                                     |                                     |
| Crystalline DD                      | DD solution<br>(in CCl <sub>4</sub> ) | Crystalline DD<br>(in KBr Pellet) | DDsolution<br>(in CHCl <sub>3</sub> ) |                                   |                                                                     |                                     |
| 242                                 | 233                                   |                                   |                                       | v <sub>20</sub>                   | 239                                                                 | C-O-C oop def                       |
| 267                                 | 271                                   |                                   |                                       | v <sub>15</sub>                   | 286                                                                 | δCH oop , skel def oop              |
| 399                                 | 395                                   |                                   |                                       | v <sub>11</sub>                   | 390                                                                 | skel def                            |
| 441                                 | 438                                   |                                   |                                       | v <sub>30</sub>                   | 433                                                                 | δC-O-C,skel def                     |
| 450                                 | 459                                   | 450                               |                                       | v <sub>14</sub> ,v <sub>58</sub>  | 450                                                                 | skel def oop                        |
| 534                                 | 531                                   |                                   |                                       | v <sub>29</sub>                   | 534                                                                 | skel def                            |
| 552                                 |                                       |                                   |                                       | v <sub>49</sub>                   | 551                                                                 | δCH oop                             |
| 565                                 |                                       |                                   |                                       | v <sub>10</sub>                   | 564                                                                 | δC-O-C,skel def                     |
|                                     |                                       | 609                               |                                       | v <sub>55</sub>                   | 610                                                                 | skel def                            |
|                                     |                                       | 668                               |                                       | v <sub>44</sub>                   | 667                                                                 | δC-O-C,skel def                     |
| 725                                 | 731                                   |                                   |                                       | v <sub>9</sub>                    | 713                                                                 | benzene ring breth                  |
| 749                                 | 747                                   | 746                               |                                       | v <sub>18</sub> , v <sub>57</sub> | 738                                                                 | δCH oop                             |
| 762                                 |                                       |                                   |                                       | v <sub>43</sub>                   | 753                                                                 | δCH oop                             |
|                                     |                                       | 831                               | 830                                   | v <sub>54</sub>                   | 837                                                                 | ring breath                         |
|                                     |                                       | 851                               |                                       | v <sub>43</sub>                   | 851                                                                 | δC-O-C,skel def                     |
|                                     |                                       | 858                               |                                       |                                   |                                                                     |                                     |
| 897                                 | 895                                   |                                   |                                       | v <sub>19</sub>                   | 906                                                                 | skel def                            |
|                                     |                                       | 908                               |                                       |                                   |                                                                     |                                     |
| 927                                 | 928                                   | 925                               | 928                                   | v <sub>42</sub> , v <sub>56</sub> | 928                                                                 | δCH oop                             |
| 980                                 |                                       |                                   |                                       | v <sub>16</sub>                   | 1013                                                                | δCH oop                             |
|                                     |                                       | 966                               |                                       |                                   |                                                                     |                                     |
| 1030                                | 1030                                  | 1030                              | 1030                                  | v <sub>8</sub> , v <sub>53</sub>  | 1032                                                                | δCH ,skel def , benzene ring breath |
| 1095                                |                                       |                                   |                                       | v <sub>27</sub>                   | 1077                                                                | δCH , skel def                      |
|                                     |                                       | 1116                              | 1113                                  | v <sub>28</sub>                   | 1112                                                                | δCH ,skel def , benzene ring breath |
| 1153                                | 1151                                  | 1150                              |                                       | v <sub>7</sub> , v <sub>52</sub>  | 1157                                                                | δCH                                 |
| 1191                                | 1186                                  | 1195                              |                                       | v <sub>26</sub> , v <sub>41</sub> | 11671203                                                            | δCH, v C-O-C, skel def              |
| 1225                                | 1227                                  | 1225                              |                                       | v <sub>6</sub>                    | 1241, 1203                                                          | v C-C, v C-O-C                      |
| 1278                                |                                       |                                   |                                       | v <sub>25</sub>                   | 1246                                                                | δCH                                 |
|                                     |                                       | 1287                              | 1288                                  | v <sub>40</sub>                   | 1267                                                                | v C-C, v C-O-C                      |
|                                     |                                       | 1295                              | 1296                                  | v <sub>51</sub>                   | 1285                                                                | v C-C, δCH                          |
|                                     |                                       | 1303                              |                                       | v <sub>50</sub>                   | 1296                                                                | v C-O-C, skel def                   |
| 1317                                | 1315                                  |                                   |                                       | v <sub>5</sub>                    | 1311                                                                | v C-O-C, skel def                   |
|                                     |                                       | 1339                              |                                       |                                   |                                                                     |                                     |
|                                     |                                       | 1396                              |                                       |                                   |                                                                     |                                     |
| 1416                                |                                       | 1412                              |                                       |                                   |                                                                     |                                     |
| 1464                                |                                       | 1465                              |                                       | v <sub>24</sub> , v <sub>39</sub> | 1441, 1463                                                          | v C-C                               |
|                                     |                                       | 1489                              | 1489                                  | v <sub>35</sub>                   | 1481                                                                | δCH,skel def                        |
| 1502                                |                                       | 1498                              |                                       | v <sub>4</sub>                    | 1497                                                                | v C-C, v C-O-C, δCH                 |
|                                     |                                       | 1512                              |                                       |                                   |                                                                     |                                     |
|                                     |                                       | 1553                              |                                       |                                   |                                                                     |                                     |
|                                     |                                       | 1567                              |                                       |                                   |                                                                     |                                     |
| 1587                                | 1588                                  | 1591                              | 1591                                  | v <sub>23</sub> , v <sub>48</sub> | 15641596                                                            | δCH,skel def                        |
| 1622                                | 1623                                  | 1626                              |                                       | v <sub>3</sub> , v <sub>38</sub>  | 1608                                                                | δCH,skel def                        |
|                                     | 3022                                  |                                   | 3075                                  | v <sub>32</sub>                   | 3075                                                                | vCH                                 |
|                                     | 3041                                  |                                   | 3086                                  | v <sub>12</sub>                   | 3086                                                                | vCH                                 |
|                                     | 3059                                  |                                   | 3094                                  | v <sub>33</sub>                   | 3094                                                                | vCH                                 |
|                                     | 3088                                  |                                   | 3100                                  | v <sub>13</sub>                   | 3100                                                                | vCH                                 |

‡ = normalized by factor 0.9628, v = stretching, δ=bending, Skel= skeleton, oop= out of plane, def= deformation

Supplementary Material (ESI) for *PCCP*  
This journal is © the Owner Societies 2009

Table S2. Observed Raman and IR vibrational modes of dibenzo-p-dioxin (DD) in a polar solvents and in DD-Cs-saponite complex

| Ref DD solution‡ | Cs-saponite-DD complex |          |           | Ref DD solution§ | Band Assignment                    |                                 |
|------------------|------------------------|----------|-----------|------------------|------------------------------------|---------------------------------|
|                  | IR                     | ATR-FTIR | FTIR-SSCF |                  |                                    | Raman-SSCF                      |
|                  |                        |          |           |                  | 233                                | C-O-C oop def                   |
|                  |                        |          |           |                  | 271                                | $\delta$ CH oop, skel def oop   |
|                  |                        |          |           | 361              | 395                                | skel def                        |
|                  |                        |          |           |                  | 438                                | skel def                        |
|                  |                        |          |           |                  | 459                                | skel oop def                    |
|                  |                        |          |           |                  | 493                                | Mg-OH or $\delta$ Si-O of clay  |
|                  |                        |          |           |                  | 482                                | Mg-OH or $\delta$ Si-O of clay  |
|                  |                        |          |           |                  | 566                                | skel def                        |
|                  |                        |          |           |                  | 531                                | Mg-O of clay                    |
|                  |                        |          |           |                  | 720                                | benzene ring breath             |
|                  |                        |          |           |                  | 746                                | skel def $\delta$ CH oop        |
| 830              | 828                    |          |           |                  | 747                                | ring breath                     |
| 928              |                        |          |           |                  |                                    | $\delta$ CH oop                 |
|                  |                        |          |           |                  | 974                                | $\nu$ Si-O of clay              |
|                  |                        |          |           |                  | 1016                               | $\nu$ Si-O oop of clay          |
| 1030             | 1019                   | 1067     | 1019      | 1030             | $\delta$ CH, skel def, ring breath |                                 |
| 1113             | 1128                   | 1121     | 1130      |                  | $\delta$ CH, skel def              |                                 |
|                  |                        |          |           |                  | 1151                               | $\delta$ CH                     |
|                  |                        |          |           |                  | 1186                               | $\delta$ CH                     |
|                  |                        |          |           |                  | 1227                               | $\nu$ C-O-C, skel def           |
| 1288             | 1285                   | 1285     | 1266      |                  | $\nu$ C-O-C, $\nu$ C-C             |                                 |
| 1296             | 1298                   | 1297     | 1293      |                  | $\nu$ C-C, $\delta$ CH             |                                 |
|                  |                        |          |           |                  | 1315                               | $\delta$ CH, skel def           |
| 1489             | 1493                   | 1491     | 1491      |                  | $\delta$ CH, skel def              |                                 |
|                  |                        |          |           |                  | 1588                               | $\delta$ CH, skel def           |
| 1591             | 1542                   |          | 1586      |                  | $\delta$ CH, skel def              |                                 |
|                  |                        |          |           |                  | 1623                               | $\delta$ CH, skel def           |
|                  |                        |          |           |                  | 1616                               |                                 |
|                  |                        |          |           |                  | 1696                               |                                 |
|                  |                        |          |           |                  | 1639                               | $\delta$ H-O-H band of water    |
|                  |                        |          |           |                  | 2119                               | Sym $\nu$ O-H of clay and water |
|                  |                        |          |           |                  | 3504                               | Asym $\nu$ O-H of clay          |
|                  |                        |          |           |                  | 3677                               |                                 |

‡ = CHCl<sub>3</sub>, § = CCl<sub>4</sub>,  $\nu$  = stretching,  $\nu$  = stretching,  $\delta$ =bending, Skel= skeleton, def= deformation, Sym= symmetric  
Asym= asymmetric, oop= out of plane
